# Supplementary material for: Medical, Genomic, and Evolutionary Aspects of the Peptide Sharing between Pathogens, Primates, and Humans
Source: PubMed Central journal article supplement (PMC7490124; doi:10.1055/s-0040-1716334), 2020-08-31
Supplement: 10-1055-s-0040-1716334-s2000011.pdf [file 10-1055-s-0040-1716334-s2000011.pdf]

# Supplementary Appendix: Description of the Heptapeptide Sharing between Pathogens and Mammals

**Supplementary Table S1** Poliovirus type 1 (strain Mahoney) (NCBI:taxid 12081)

| Organism                       | N° | Shared heptapeptides                                                                                                                                                                                                                                                                                                                                                                                                                                                                                                                          |
|--------------------------------|----|-----------------------------------------------------------------------------------------------------------------------------------------------------------------------------------------------------------------------------------------------------------------------------------------------------------------------------------------------------------------------------------------------------------------------------------------------------------------------------------------------------------------------------------------------|
| <i>Bos taurus</i>              | 13 | EAFSKY, EVEILDA, GFAAALK, LEALDLS, VEILDAK, ATLALLG, CPRPPRA, IITAGGE, PGAPVPE, QISDKIT, TKLRQLE, VTKLRQL, VLQLTLG                                                                                                                                                                                                                                                                                                                                                                                                                            |
| <i>Canis lupus familiaris</i>  | 5  | LEALDLS, LLLKTYK, ATLALLG, CPRPPRA, QMLESMI                                                                                                                                                                                                                                                                                                                                                                                                                                                                                                   |
| <i>Felis catus</i>             | 2  | LEALDLS, QMLESMI                                                                                                                                                                                                                                                                                                                                                                                                                                                                                                                              |
| <i>Gorilla gorilla gorilla</i> | 1  | GDSLYGA                                                                                                                                                                                                                                                                                                                                                                                                                                                                                                                                       |
| <i>Homo sapiens</i>            | 59 | AAVAGVV, AGSAPLS, APLSVFT, CTGKVG, EAFSKY, EALDLST, EDAMYGT, EVDASLL, EVEILDA, GFAAALK, LEALDLS, LLLKTYK, LLLPEYS, LQAVDSQ, RALLPE, SAPLSVF, VEILDAK, AAKGLEW, AALGDSL, ATLALLG, CPRPPRA, DGTTLPL, EKLLKNL, GAPVPEK, GDSLYGA, GTGKSV, GTLTPLS, GVVIMDD, IITAGGE, KGLEWVS, KLLKNLI, LASTNSS, LATLALL, LGCDASP, PGTGKSV, PPGAPVP, QISDKIT, RPPRAVA, RSRSESS, RYVLPKP, SLPPDPS, SRISPPT, TKLRQLE, VNDHNPT, ATGKLLV, IVVPLST, KNTMEMY, LGNGTLL, LLGNAFV, LLGNGTL, LSLSPAS, PNTEASG, PREMDIL, PVDYLLG, QKALAQG, QMLESMI, TGKLLVS, VVPLSTP, YLRDSEA |
| <i>Mus musculus</i>            | 38 | AGSAPLS, DASLSPA, EAFSKY, EDAMYGT, EEAIFSK, EVDASLL, GFAAALK, GKSRLE, IGRALLL, IYLFAGS, KEMQKLL, KSRLIEA, LEALDLS, LLLKTYK, LLLPEYS, LQAVTTF, MSLDINT, RALLPE, AALGDSL, ALARRFA, ATLALLG, CPRPPRA, DGTTLPL, EILFNNV, FSDIRDL, GDSLYGA, GTLTPLS, IITAGGE, KDGTLP, LATLALL, LYGAASL, PPGAPVP, QLEMLEN, RPPRAVA, SCPSQEH, SLEEKGI, TKLRQLE, VPPGAPV                                                                                                                                                                                              |
| <i>Oryctolagus cuniculus</i>   | 8  | AAVAGVV, EAFSKY, EVDASLL, AALGDSL, CPRPPRA, TKLRQLE, LPLAPLN, QMLESMI                                                                                                                                                                                                                                                                                                                                                                                                                                                                         |
| <i>Pan troglodytes</i>         | 1  | GDSLYGA                                                                                                                                                                                                                                                                                                                                                                                                                                                                                                                                       |
| <i>Rattus norvegicus</i>       | 27 | EAFSKY, EDAMYGT, EVDASLL, FHYVFEG, GFAAALK, GLPNKKP, IGRALLL, LEALDLS, LLLKTYK, ALARRFA, ATLALLG, CPRPPRA, EILFNNV, FTSNYVL, IITAGGE, KDTVQLR, LATLALL, LYGAASL, QISDKIT, RSRSESS, APPGADP, ATGKLLV, LLGNGTL, PVDYLLG, QMLESMI, VVPLSTP, YLRDSEA                                                                                                                                                                                                                                                                                              |
| <i>Sus scrofa</i>              | 4  | EALKMVL, GFAAALK, LEALDLS, CPRPPRA                                                                                                                                                                                                                                                                                                                                                                                                                                                                                                            |

**Supplementary Table S2** Measles virus (strain Edmonston-Zagreb vaccine) (NCBI:taxid 70149)

| Organism                       | N°  | Shared heptapeptides                                                                                                                                                                                                                                                                                                                                                                                                                                                                                                                                                                                                                                                                                                                                                                                                                                                                                                                                                                                                                                                                                                                                                                 |
|--------------------------------|-----|--------------------------------------------------------------------------------------------------------------------------------------------------------------------------------------------------------------------------------------------------------------------------------------------------------------------------------------------------------------------------------------------------------------------------------------------------------------------------------------------------------------------------------------------------------------------------------------------------------------------------------------------------------------------------------------------------------------------------------------------------------------------------------------------------------------------------------------------------------------------------------------------------------------------------------------------------------------------------------------------------------------------------------------------------------------------------------------------------------------------------------------------------------------------------------------|
| <i>Bos Taurus</i>              | 34  | ACQVIAE, ALLPAPI, KDKALAA, LARALRS, LASLMPE, LLGLGVL, NVSLEEL, QLARALR, SLEELRV, SQSLKSI, AVLLTQ, EIAEYRR, EPGEDGL, KDTIEKL, LLNEELE, LLSSFLS, VGLVEHR, VLLTLQT, DVE-TAEG, GPGAPAG, PPPDPG, SLSLLDL, SSNLVIL, VLTPLFK, DVETAEG, GLSRPSP, IKKGHRR, IPLDTPQ, KLESLLL, LDTPQRF, LESLLLL, PPPDPG, SEVVSAD, VFALGGI                                                                                                                                                                                                                                                                                                                                                                                                                                                                                                                                                                                                                                                                                                                                                                                                                                                                       |
| <i>Canis lupus familiaris</i>  | 6   | EAVTAAE, LGSELRE, LREDIKE, VSLEELR, KDTIEKL, ALIQEWT                                                                                                                                                                                                                                                                                                                                                                                                                                                                                                                                                                                                                                                                                                                                                                                                                                                                                                                                                                                                                                                                                                                                 |
| <i>Felis catus</i>             | 1   | GPASRSV                                                                                                                                                                                                                                                                                                                                                                                                                                                                                                                                                                                                                                                                                                                                                                                                                                                                                                                                                                                                                                                                                                                                                                              |
| <i>Gorilla gorilla gorilla</i> | 1   | GLGDRKD                                                                                                                                                                                                                                                                                                                                                                                                                                                                                                                                                                                                                                                                                                                                                                                                                                                                                                                                                                                                                                                                                                                                                                              |
| <i>Homo sapiens</i>            | 140 | ACQVIAE, ALAALQR, ALLPAPI, CHRRRHT, CSVQLAR, DKESTRK, EAVTAAE, ELLISRD, ELRAELC, ESMRGHL, GIYYDGL, GSRRLLV, GTGSRR, HPRLEAV, IRASMRK, LAVSGVP, LLGLGVL, LLVSQSL, LNDSSFD, LREDIKE, NAQASGE, PDVLESM, PSRSLRS, RLARGRP, RLEAVTA, SELREDI, SLEELRV, SLFAQRL, SPVHTST, SQSLKSI, SRLGLS, SRRLVDV, SVELLIS, TCHRRRH, TGRKRN, TKGLIRA, TSLRVA, TVELRGA, VINLGVY, AEVNVSQ, AVLLTQ, CSLTYLR, DLIGQKL, EIAEYRR, EYRLLR, GEDGLFL, GIKARIT, GPSLRDP, HCGIIEP, KDTIEKL, KLEELAA, KLVGYSA, LCKELIH, LEKLGYS, LIGQKLG, LLNEELE, LLSSFLS, LNEELE, LRASLET, LSPAGSS, LTLQPT, NIFVKNL, PVLVSSR, RELISRI, RVDPGFI, SSRQREL, SSVRTSP, VGLVEHR, VLLTLQT, AGSSGLS, AKELLES, ASLLTGG, DNESENS, DVETAEG, EELMNAL, EISDNPG, ELSQLSM, FLSLIGL, FGPLIT, GLLAIAG, GPGAPAG, HELLRLQ, KELLESS, KRSELSQ, LEDAKEL, LGELKLA, LLAIAGI, NLDVTNS, PGLGAPV, RLHRAAI, RSMKGLS, SDVDIGE, SELSLS, SGFGPLI, SGPGAPA, SLSLLDL, SNMSLSL, SSNLVIL, VLFVMFL, VLLAVLF, VLTPLFK, YPDAVYL, ADVEINP, AGSSGLS, AVKRLRE, AVLQPSV, DLERAMT, DNESENS, DNGYYTV, DVEINPD, DVETAEG, EISDNPG, FLLGVVE, GLGDRKD, GPASRSV, GRALAEV, HELLRLQ, HIRSTGK, IPGLGKD, ISISTLE, KLESLLL, LAKIHE, LESLLLL, LKEATEL, LLKEATE, LLKEFQL, LSRPSPS, QKEGRST, |

(Continued)

**Supplementary Table S2** (Continued)

| Organism                     | N°  | Shared heptapeptides                                                                                                                                                                                                                                                                                                                                                                                                                                                                                                                                                                                                                                                                                                                                                                                                                                                                                                                                                                  |
|------------------------------|-----|---------------------------------------------------------------------------------------------------------------------------------------------------------------------------------------------------------------------------------------------------------------------------------------------------------------------------------------------------------------------------------------------------------------------------------------------------------------------------------------------------------------------------------------------------------------------------------------------------------------------------------------------------------------------------------------------------------------------------------------------------------------------------------------------------------------------------------------------------------------------------------------------------------------------------------------------------------------------------------------|
|                              |     | RQAVRVS, SDVDIGE, SGLSRPS, SKLESLL, SKMLTLS, SLTGDLL, SRPSPSA, SSRLEED, SVIRSII, VFALGGI, VKRLRES, VRIQAVL                                                                                                                                                                                                                                                                                                                                                                                                                                                                                                                                                                                                                                                                                                                                                                                                                                                                            |
| <i>Macaca mulatta</i>        | 1   | GLGDRKD                                                                                                                                                                                                                                                                                                                                                                                                                                                                                                                                                                                                                                                                                                                                                                                                                                                                                                                                                                               |
| <i>Mus musculus</i>          | 106 | ACQVIAE, ALAALQR, ALLPAPI, DPHCPPD, EAVTAAE, EGYCQKL, ELRAELC, ESMRGHL, GIYYDGL, GSRRLVD, GSSNTVL, GTGSRRL, IPSSRKL, KRLETSV, LLGLGVL, LLVSQSL, NVSLEEL, PDVLESM, PSRSLRS, SDLTMYL, SLEELRV, SLKEKEI, SQSLKSI, SRRLVDV, SRSLRSA, SSVELLI, SVELLIS, SVLYVSD, TGRKRNV, TGSNTV, VELLISR, VINLGVY, YLTFELV, AVLLTLQ, CSLTYLR, DLIGQKL, EELAAIL, EIAEYRR, EYRRLLR, HCGIIEP, HHDVASG, KDTIEKL, LAGAALG, LEKLGYS, LEPGEDG, LRASLET, PGEDGLF, PVLVSSR, SILVIKL, SSACYKA, SSRQREL, TAGIALH, VGLVEHR, VLLTLQT, AGSSGLS, ASFGTEI, DGDVKLS, DVETAEG, EELMNAL, EISDNPG, FLSLIGL, GFGPLIT, GKGVSFQ, GPGAPAG, GSSGLSK, HELLRLQ, HGSGMDL, LEDAKEL, LGELKLA, PPPDPG, REEKAGS, RLHRAAI, SGFGPLI, SGPGAPA, SLSLLDL, SSNLVIL, STDDPVI, VLLAVLF, VLTPLFK, VRSMLSP, YGVLSVD, YVLLAVL, AGSSGLS, AVLQPSV, DNGYYTV, DVETAEG, EISDNPG, EVYSADY, FLLGVVE, GPASRSV, GRALAEV, GSSGLSK, HELLRLQ, ISKLESL, KSSRLEE, LKEATEL, LLKEATE, LLKEFQL, LPSLWGS, PPPDPG, QLPEATF, REEKAGS, RTSSRGQ, SKLESLL, SKMLTLS, STAKPEK |
| <i>Oryctolagus cuniculus</i> | 5   | LRGAFLN, EIAEYRR, GFGPLIT, SGFGPLI, GPASRSV                                                                                                                                                                                                                                                                                                                                                                                                                                                                                                                                                                                                                                                                                                                                                                                                                                                                                                                                           |
| <i>Pan troglodytes</i>       | 5   | KEEDEGL, RELISRI, SNMSLSL, GLGDRKD, SLTGDLL                                                                                                                                                                                                                                                                                                                                                                                                                                                                                                                                                                                                                                                                                                                                                                                                                                                                                                                                           |
| <i>Rattus norvegicus</i>     | 55  | ALLPAPI, EAVTAAE, ESMRGHL, GIYYDGL, GSSNTVL, GTGSRRL, IPSSRKL, LLGLGVL, PDVLESM, QGMILLG, SLEELRV, SQSLKSI, STRNVRA, TGRKRNV, TPISTST, TVELRGA, VINLGVY, VYSKGIY, YLTFELV, EIAEYRR, GPSLRDP, KDTIEKL, LAGAALG, PVLVSSR, VLLTLQT, VVLAGAA, YLDLLL, YYTEILS, DGDVKLS, DVETAEG, EELMNAL, EISDNPG, GFGPLIT, GKGVSFQ, GLSSTSI, GPGAPAG, KGLSSTS, PPPDPG, SGFGPLI, SLSLLDL, VLTPLFK, YGVLSVD, DNGYYTV, DVETAEG, EISDNPG, GPASRSV, KLESLLL, KSSRLEE, LLKEFQL, LPSLWGS, PPPDPG, QLKPIGK, QLPEATF, RQAVRVS, SKMLTLS                                                                                                                                                                                                                                                                                                                                                                                                                                                                            |
| <i>Sus scrofa</i>            | 5   | EVPDVLE, LLGLGVL, EIAEYRR, GDLLGIL, SEVYSAD                                                                                                                                                                                                                                                                                                                                                                                                                                                                                                                                                                                                                                                                                                                                                                                                                                                                                                                                           |

**Supplementary Table S3** Dengue virus type 1 (strain Nauru/West Pac/1974) (NCBI:taxid 11059)

| Organism                       | N° | Shared heptapeptides                                                                                                                                                                                                                                                                                                                                                                                                                                                                                                                                                                                                                                                                                                                                                                                                    |
|--------------------------------|----|-------------------------------------------------------------------------------------------------------------------------------------------------------------------------------------------------------------------------------------------------------------------------------------------------------------------------------------------------------------------------------------------------------------------------------------------------------------------------------------------------------------------------------------------------------------------------------------------------------------------------------------------------------------------------------------------------------------------------------------------------------------------------------------------------------------------------|
| <i>Bos taurus</i>              | 25 | AGLAFSL, AKRGTAQ, DLGCGRG, GAGWSLR, GEKWKRO, QAAILMG, RDLRLAA, CVTKLEG, KLLSGQ, KYSVIVT, LTGATEI, RGKSLLF, AMILSIV, EVDSFSL, GEVDSFS, ILLSLL, KIKDEER, LLSLLK, PVLGSL, TTNIWLK, EGEVGAI, GKEIVDL, IIMDEAH, LSGRGLG, LVLAPTR                                                                                                                                                                                                                                                                                                                                                                                                                                                                                                                                                                                             |
| <i>Canis lupus familiaris</i>  | 3  | QAAILMG, ASTSQET, LLLTVGL                                                                                                                                                                                                                                                                                                                                                                                                                                                                                                                                                                                                                                                                                                                                                                                               |
| <i>Gorilla gorilla gorilla</i> | 1  | EHGTTAT                                                                                                                                                                                                                                                                                                                                                                                                                                                                                                                                                                                                                                                                                                                                                                                                                 |
| <i>Homo sapiens</i>            | 89 | AGAGLAF, AGLAFSL, AKRGTAQ, DLGCGRG, ERELHKQ, ETLEQMQ, GAGWSLR, LFMILTA, LFMILT, NTTANIS, PSGSASS, QAAILMG, RDLRLAA, SLIGLTA, TLATGPL, TNIQVAI, VAVEPEV, VDLHPAS, VMDVISR, YADDTAG, AGEKALK, ALTLDCS, EHGTTAT, FLAIPPT, GAGEKAL, GKIVQYE, GKMFEAT, GLSGATW, GSLITCA, KLLSGQ, KMFEATA, LGSQEGA, LLMLLPT, NLKYSVI, PAVLRKL, RGKSLLF, VSQAKR, VVLGSQE, YGTCSQT, YIVVGAG, ADLSLEK, DVSGILA, ELGDGLA, EVEDYGF, FAVGLLF, GDVSGIL, GIVSILL, GLLFRRL, GSGIFVT, HLGKLEL, ILLSLL, KIWRGRS, KLELDFD, LGKLELD, LIHQIFG, LLKATLL, LLTMGQ, LLSLTFV, LPNSLEE, LSLVASV, LTSREVL, NGVLESE, PSRLTTT, PVLGSL, SSADLSL, VLLTVG, DFPKTV, EGEVGAI, EREKSAA, GKEIVDL, IIMDEAH, KPGTSGS, KRIVVQLS, LKPVILK, LLSPVRV, LREFKEF, LVLAPTR, PGTSGSP, PPGSVEA, PSPPEVE, PVTVASA, RLRGEAR, SPPEVER, TEAKMLL, TMLLAL, TSPPEV, VGLYGNG, VRTLVLVA, VTVASAA |
| <i>Mus musculus</i>            | 80 | AGAGLAF, AKRGTAQ, CLGKSYA, ESDPEGA, FEKQLGQ, FSPSELE, GDDCVVK, GETLGEK, LFMILTA, LLATSIF, LFMILT, MEAQLIR, NMEAQLI, NTTANIS, QAAILMG, RDLRLAA, VAVEPEV, VDLHPAS, YADDTAG, AGEKALK, ALTLDCS, AMDLDEL, EVVVLGS, GKIVQYE, GKMFEAT, GLSGATW, KLLSGQ, KMFEATA, LGSQEGA, LLMLLPT, LTGATEI, LVMAFIA, QEVVVLG, TQNGRLI, AEHS GAS, AGPWHLG, CLSTTSQ, EVEDYGF, FAVGLLF, GLLFRRL, GLSLVAS, GPSLRTT, GSGIFVT, GSGGVF, HLGKLEL, ILLSLL, KLELDFD, LGCKPLT, LGKLELD, LLKATLL, LLLTVGL, LSLVASV, LSSLLKN, LTSREVL, PSRLTTT, SILLSSL, SNGVLES, SLLKND, TVGLSLV, DPRRCLK, EGEVGAI, ERAVLDD, EREKSAA, ERKKLRP, GKEIVDL, HPGSGKT, IVREAIR, KEGERKK, LLSPVRV, LREFKEF, LVLAPTR, PPGSVEA, QEGPLPE, RLRGEAR, TSPPEV, VGLYGNG, VREAIRR, VRTLVLVA, VTVASAA, YVVTDDI                                                                              |
| <i>Oryctolagus cuniculus</i>   | 6  | AGAGLAF, KRQLNQL, GSGIFVT, GMGEEAA, LVLAPTR, QRGLLGR                                                                                                                                                                                                                                                                                                                                                                                                                                                                                                                                                                                                                                                                                                                                                                    |
| <i>Pan troglodytes</i>         | 3  | EHGTTAT, YSVIVTV, LVLAPTR                                                                                                                                                                                                                                                                                                                                                                                                                                                                                                                                                                                                                                                                                                                                                                                               |

**Supplementary Table S3** (Continued)

| Organism                 | N° | Shared heptapeptides                                                                                                                                                                                                                                                                                                                        |
|--------------------------|----|---------------------------------------------------------------------------------------------------------------------------------------------------------------------------------------------------------------------------------------------------------------------------------------------------------------------------------------------|
| <i>Rattus norvegicus</i> | 37 | AGAGLAF, AKRGTQAQ, CLGKSYA, LAANAIC, LFMILTA, LLMILTA, NTTANIS, QAAILMG, RDLRLAA, SLIGLTA, TTLWEGS, VAVEPEV, YAVATTI, AGEKALK, AKISNTT, GKMFEAT, KMFEATA, LGSQEGA, AEHSGAS, CLSTTSQ, GLSLVAS, GSGIFVT, GSIGGVF, HLGKLEL, LGKLELD, LSIVSLF, LTSREVL, PSLRTRT, QLWATLL, GKEIVDL, IVREAIR, LVLAPTR, MRLLSPV, TPSPEV, VREAIRR, VTVASAA, YVVTTDI |
| <i>Sus scrofa</i>        | 3  | QAAILMG, QNKVVRV, RDLRLAA                                                                                                                                                                                                                                                                                                                   |

**Supplementary Table S4** Severe acute respiratory syndrome coronavirus 2 (SARS-CoV-2) (NCBI:taxid 2697049)

| Organism                       | N°  | Shared heptapeptides                                                                                                                                                                                                                                                                                                                                                                                                                                                                                                                                                                                                                                                                                                                                                                                                                                                                                                                                                                                                                                                                                                                                                                                                                                                                                                                                                                                                                                                                                                                                                                                                                                                                                                                                                                                                                                                                                                                                                                                                                                                                                                                                                                                                                                                                                                                                                                                                                                                                                                                                                   |
|--------------------------------|-----|------------------------------------------------------------------------------------------------------------------------------------------------------------------------------------------------------------------------------------------------------------------------------------------------------------------------------------------------------------------------------------------------------------------------------------------------------------------------------------------------------------------------------------------------------------------------------------------------------------------------------------------------------------------------------------------------------------------------------------------------------------------------------------------------------------------------------------------------------------------------------------------------------------------------------------------------------------------------------------------------------------------------------------------------------------------------------------------------------------------------------------------------------------------------------------------------------------------------------------------------------------------------------------------------------------------------------------------------------------------------------------------------------------------------------------------------------------------------------------------------------------------------------------------------------------------------------------------------------------------------------------------------------------------------------------------------------------------------------------------------------------------------------------------------------------------------------------------------------------------------------------------------------------------------------------------------------------------------------------------------------------------------------------------------------------------------------------------------------------------------------------------------------------------------------------------------------------------------------------------------------------------------------------------------------------------------------------------------------------------------------------------------------------------------------------------------------------------------------------------------------------------------------------------------------------------------|
| <i>Bos taurus</i>              | 70  | DFTEERL, AMQRKLE, ASAVVLL, AVVLLIL, EKMVSLL, LFLPSL, LGVGGPK, NYEPLTQ, QARSEDK, SLLSVLL, YNYEPLT, ADVWEKF, ASKILGL, DPAQLPA, EYFNSVC, FEKGDYD, GPPGTGK, HISTIGV, NVAITRA, PPGTGKS, RYPANSI, VAITRAK, VDLFRNA, VLSNLNL, YPANSIV, EILQKEK, ESGLKTI, GAKLKAL, KDLLARA, KGKAKKG, SEARQHL, SGLKTI, EKTKTLV, IALKGGK, KGGKIVN, LIWNVVD, TLATHGL, TSNSFDV, VDNSSLT, FKNLREF, FVSDADS, KVVKVTI, LDDDFVE, PQTLEIL, QTLEILD, TRAGCLI, LDKYFKN, LLLVAAG, LVKQLSS, RVAGDSG, SHLLVA, SSTASAL, TTTSVPL, AALALLL, AEGSRGG, ALALLLL, DAALALL, GKMKDLS, LALLLLD, PSASAFF, SRSSRS, EEEQEE, EVKPFIT, IPKEEVK, KHGGGVA, LKHGGGV, LLAPLLS, NLKTLLS, PEEEQEE, VVADAVI                                                                                                                                                                                                                                                                                                                                                                                                                                                                                                                                                                                                                                                                                                                                                                                                                                                                                                                                                                                                                                                                                                                                                                                                                                                                                                                                                                                                                                                                                                                                                                                                                                                                                                                                                                                                                                                                                                                        |
| <i>Canis lupus familiaris</i>  | 15  | APGTAVL, GPPGTGK, KGKAKKG, LKHGGGV, IALKGGK, VDNSSLT, DTSLSGF, EKMVSLL, VAGGIVA, ALITLAT, LALITLA, LLLVAAG, SVLLFLA, TVEELKK, VFLLVTL                                                                                                                                                                                                                                                                                                                                                                                                                                                                                                                                                                                                                                                                                                                                                                                                                                                                                                                                                                                                                                                                                                                                                                                                                                                                                                                                                                                                                                                                                                                                                                                                                                                                                                                                                                                                                                                                                                                                                                                                                                                                                                                                                                                                                                                                                                                                                                                                                                  |
| <i>Felis catus</i>             | 1   | DTSLSGF                                                                                                                                                                                                                                                                                                                                                                                                                                                                                                                                                                                                                                                                                                                                                                                                                                                                                                                                                                                                                                                                                                                                                                                                                                                                                                                                                                                                                                                                                                                                                                                                                                                                                                                                                                                                                                                                                                                                                                                                                                                                                                                                                                                                                                                                                                                                                                                                                                                                                                                                                                |
| <i>Gorilla gorilla gorilla</i> | 1   | LKTLLSL, ALITLAT, LALITLA                                                                                                                                                                                                                                                                                                                                                                                                                                                                                                                                                                                                                                                                                                                                                                                                                                                                                                                                                                                                                                                                                                                                                                                                                                                                                                                                                                                                                                                                                                                                                                                                                                                                                                                                                                                                                                                                                                                                                                                                                                                                                                                                                                                                                                                                                                                                                                                                                                                                                                                                              |
| <i>Homo sapiens</i>            | 281 | DFTEERL, DTLKEIL, GGTSSGD, GNLLDK, GSGVPV, GTSSGDA, HAASGNL, HQKLLKS, ILTTRA, KLVLSVN, LGERVRQ, LLSLDLQD, PGSGVPV, PLVRKIF, QDALFAY, RARTVAG, RLSFKEL, RQLLFV, SRQLTK, SSGDATT, TVLQAVG, VDAAKAY, VRQALLK, YGCSCDQ, AGKASCT, EEIAILL, EEEVLT, EIKDTEK, ESGLKTI, EVEKGLV, EVLTEE, FIKRSDA, GAKLKAL, GETLPTE, KDLLARA, KFLALCA, KGKAKKG, LARAGKA, LASFSAS, LEILQKE, LVAELEG, PQLEQPY, RVEKTKL, SCGNFKV, SEARQHL, SGLKTI, SVEEVLS, TEEVVLK, TENLTKE, VEKGVLP, APGTAVL, CVCSVID, DEVRQIA, DKVFRSS, FKNLREF, FLPPFSN, FVSDADS, GRLLIRE, IGAGICA, IQQLLAL, KLNDLCF, KTKNVTK, KVVKVTI, LDDDFVEI, LHLIIGL, LSLLSKG, PGTAVLR, QRMLLEK, RARVAS, RRARVA, SLLIVNN, SPRRARS, SSSGWTA, TLIGEAV, TRFQTL, VSGTNGT, VTLIGEA, VYSTGSN, AALALLL, AEGSRGG, ALALLLL, DAALALL, DKKKKAD, FLVFLGI, FTLKRKT, GKMKDLS, KADETQA, KDKKKKA, KDKKKK, KLGSLLV, LGIITTV, LLLDRL, LLPAADL, LVFLGII, NSSPDDQ, RGQGVPI, RPQGLPN, RQEEVQE, RSSRSR, SKQLQQS, SMSSADS, SRGGSQA, SRSRNS, SRSSRS, SSRSSR, VAAIVFI, VLQLPQG, ADVWEKF, AENVTVL, APTLVVQ, DIPGIPK, EYFNSVC, FNVAITR, GKPRPPL, GPPGTGK, HISTIGV, IATVREV, IPGIPKD, IVDTVSA, LFAAETL, LQGPPGT, NVAITRA, PEVKILN, PPGTGKS, QGPPGTG, RFNVAIT, RPQIGVV, RYPANSI, SKILGLP, TREAVGT, TRLQSL, TVDSSQG, VAITRAK, VCNAPGC, VDLFRNA, VNALPET, YPANSIV, AIFYLIT, AKKNNLP, DSDVETK, EKTKTLV, ELSRVLG, FDSEYCR, GDFLHFL, GLAAVNS, IALKGGK, IIVFLL, IKVTLVF, KGGKIVN, KKGAKLL, KKNLPL, LACEDLK, LAKNVSL, LSLQFKR, NSLKITE, PGTILRT, QPILLD, RFFYVLG, RRSFYVY, RSFYVYA, RYVLMGD, SAKSASV, SIHLYFD, TLATHGL, TPSFKKG, TSNSFDV, VDNSSLT, VTVKNGS, ALITLAT, DEDDSEP, EDDSEPV, EELKLL, EIDRLNE, ELKLL, GLTVLPP, HLLVAA, KCRSKNP, KVEAEVQ, LAFVFL, LAILTAL, LALITLA, LDKYFKN, LIRAAEI, LKLLLEQ, LLESELV, LLLVAAG, LLVAAGL, LPPLLTD, LVKQLSS, NASVNI, NSVLLFL, SSTASAL, SVLLFLA, SVTSSIV, TALRLCA, TGRLQSL, TQLSTDT, VEELKLL, VFLLVTL, VGVALLA, VNSVLLF, VTLADAG, AGEANF, ATALLT, DEDEEG, DIQLLKS, EDEEGD, EDIQLL, EEEQEE, EGKTFYV, ELTPVVQ, EVKPFIT, GPLKVG, IPKEEVK, IQLLKA, KEEVKPF, KLVSSFL, KTTVASL, LGIEFLK, LKGVAV, LKSAYEN, LKTLLS, LLAPLLS, LLSAGIF, LSGHNL, NDLNETL, NGNLHPD, NLKTLLS, PDEEEE, PEEEQEE, PEEHFIE, SAALQPE, SELLTPL, SKTTVAS, TFDNLK, TLQQL, TLVSDID, VSELLTP, VSVSSPD, YENFNQH, AACCHLA, AMQRKLE, ASAVVLL, AVVLLIL, DSEVVLK, DTSLSGF, DVVYCP, EKMVSLL, EVLKLK, FTPLIQ, GTTFTYA, GVVTTVM, IASEFSS, KELLQNG, LEGNFY, LFLPSL, LKELLQ, LKLLKS, LLPLTQ, LTSLVL, NGRTILG, NSGSDV, NYEPLTQ, PSLATVA, QARSEDK, QGLLPPK, SASIVAG, SGVTTV, SGVYQCA, SLKELLQ, SLLSVL, SLVLVQ, SVVLLSV, TDTTITV, TILSLL, TSLVLV, TSLSGFK, VAGGIVA, VLKLV, VSLLSVL, YNYEPLT |
| <i>Macaca mulatta</i>          | 4   | APTLVPQ, ELTPVVQ, TLEILDI, YDTNVLE                                                                                                                                                                                                                                                                                                                                                                                                                                                                                                                                                                                                                                                                                                                                                                                                                                                                                                                                                                                                                                                                                                                                                                                                                                                                                                                                                                                                                                                                                                                                                                                                                                                                                                                                                                                                                                                                                                                                                                                                                                                                                                                                                                                                                                                                                                                                                                                                                                                                                                                                     |
| <i>Mus musculus</i>            | 240 | AALALLL, ALALLLL, ASSRSS, DAALALL, FTLKRKT, ITTVAAF, KDKKKK, KLGSLLV, LALLLLD, LVFLGII, RPQGLPN, RSSRSR, SRSRNS, SRSSRS, SSRSSR, TGAIKL, VGARKSA, VLQLPQG, DFTEERL, GSGVPV, HQKLLKS, ILTTRA, LLSLDLQD, NICQAVT, NLLDKR, PGSGVPV, QDALFAY, QEKDEDD, QKLLSI, RARTVAG, RLSFKEL, RQLLFV, TVLQAVG, VDAAKAY, YGCSCDQ, YKDYLAS, AELEGIQ,                                                                                                                                                                                                                                                                                                                                                                                                                                                                                                                                                                                                                                                                                                                                                                                                                                                                                                                                                                                                                                                                                                                                                                                                                                                                                                                                                                                                                                                                                                                                                                                                                                                                                                                                                                                                                                                                                                                                                                                                                                                                                                                                                                                                                                      |

(Continued)

**Supplementary Table S4** (Continued)

| Organism                     | N°  | Shared heptapeptides                                                                                                                                                                                                                                                                                                                                                                                                                                                                                                                                                                                                                                                                                                                                                                                                                                                                                                                                                                                                                                                                                                                                                                                                                                                                                                                                                                                                                                                                                                                                                                                                                                                                                                                                                                                                                                                                      |
|------------------------------|-----|-------------------------------------------------------------------------------------------------------------------------------------------------------------------------------------------------------------------------------------------------------------------------------------------------------------------------------------------------------------------------------------------------------------------------------------------------------------------------------------------------------------------------------------------------------------------------------------------------------------------------------------------------------------------------------------------------------------------------------------------------------------------------------------------------------------------------------------------------------------------------------------------------------------------------------------------------------------------------------------------------------------------------------------------------------------------------------------------------------------------------------------------------------------------------------------------------------------------------------------------------------------------------------------------------------------------------------------------------------------------------------------------------------------------------------------------------------------------------------------------------------------------------------------------------------------------------------------------------------------------------------------------------------------------------------------------------------------------------------------------------------------------------------------------------------------------------------------------------------------------------------------------|
|                              |     | DNLLEIL, EIKDTEK, ESGLKTI, EVEKGV, FIKRSDA, GETLPTE, GVVGEFS, KDLLARA, KGKAKKG, KPVLDWL, LEILQKE, LPTEVLT, LVALEG, PACHNSE, PLVGPVP, PQLEQPY, SEARQHL, SGLKTI, TEEVVLK, TENLTKE, TLPTEVL, VEKGVLP, AALLADK, ADVEWKF, ANEYRLY, CTERLKL, DIPGIPK, EVKILNN, FNVAITR, GPPGTGK, HISTIGV, IATVREV, IVDTVSA, LFAAETL, NVAITRA, PEVKILN, PPGTGKS, QGPPGTG, RFNVAIT, RYPANSI, SKILGLP, TRLQSL, VDLFRNA, VKILNNL, VNLKQLP, YPANSIV, AKNLNES, ALITLAT, EAEVQID, EIDRLNE, ELKKLE, FVVLLV, GLTVLPP, HSSSSDN, INLIKN, LAILTAL, LALITLA, LFLAFVV, LIRAAEI, LKGCSC, LKKLEQ, LLLVAAG, LLVAAGL, LVKQLSS, NHTSPDV, NSVLLFL, RPLLESE, SSTASAL, SSVLNDI, SVLLFLA, TGRLQSL, VEELKKL, VGVALLA, VLLFLAF, VNSVLLF, CTEVPVA, DEVRQIA, DSFVIRG, EAVKTQF, ENGTITD, FIERYKL, FKNLREF, FLVLLPL, FVSDADS, GRLLIRE, GSVAIKI, IDLLDD, IQQLAL, IVYGDFFS, KVVKVTI, LIVNNAT, LLPLVSS, NCTEVPV, NPIQLSS, NRKRISN, PGTAVLR, QPGVAMP, QTLEILD, RKSNLKP, SFVIRGD, SSSGWTA, TLIGEAV, TLLALHR, TRFQTL, VTKENDS, VTLIGEA, AKKNNLP, ASGKVP, AYVNTFS, CLSGLDS, ESSAKSA, FDAYVNT, GGVTRDI, IALKGGK, IKVTLVF, KGGKIVN, KKNLPLF, LACEDLK, LAKNVSL, LKTLVAT, NSLKITE, PGTILRT, QPILLD, RFFVVLG, RRSFYVY, RSFYVYA, RVVTFD, SAKSASV, SLSEQLR, STFISAA, TKGSLPI, TLATHGL, TSNSFDV, VDNSSLT, VLEGSVA, VTRDIAS, VTKNGS, VVTFDS, AMQRKLE, AVVLLIL, DVVYCP, EKMVSLL, EVVLLKL, FNTLLFL, GPLSAQT, GTTFTYA, IASEFSS, IVTALRA, LFLPLS, LGVGGK, LKELLQN, LLPLTQY, LLPPKNS, LTSLLVL, NSGSDVL, QARSEDK, QGLLPPK, QLRVSS, SASIVAG, SGVVTTV, SLLSVLL, SVVLLSV, TAQEAYE, TDTTITV, VAGGIVA, VESSSKL, VLKLVK, VSFLAHI, VSLLSVL, YNYEPLT, AGEAANF, DEDEEEG, DIQLLKS, EDEEEGD, EEEQED, EGKTFYV, HGGGVAG, IKIQEGV, IPKEEVK, IQLLKA, KTTVASL, LEFGATS, LGIEFLK, LKGVAV, LKSAYEN, LKTLLSL, LLAPLLS, LLSLREV, LSGHNLA, MLAKALR, NGNLHPD, NLKTLLS, PEEEQEE, PEEHFIE, PLSAGI, SKTTVAS, SYSGQST, TESKPSV, TFDNLKT, TKKAGGT, VSELLTP, VSVSSPD, VVVNAAN, YENFNQH, YVEEAK |
| <i>Oryctolagus cuniculus</i> | 18  | AALTNNV, IVYGDFFS, EDIQLL, SAALQPE, FIKRSDA, KGKAKKG, KDFMSLS, VDNSSLT, EIDRLNE, LIFLWLL, LLLVAAG, EKMVSLL, SGAMDTT, VAGGIVA, EVKILNN, GPPGTGK, PEVKILN, VKILNNL                                                                                                                                                                                                                                                                                                                                                                                                                                                                                                                                                                                                                                                                                                                                                                                                                                                                                                                                                                                                                                                                                                                                                                                                                                                                                                                                                                                                                                                                                                                                                                                                                                                                                                                          |
| <i>Pan troglodytes</i>       | 12  | APTLVPQ, FIKRSDA, LEGNFY, TSNSFDV, YGCSCDQ, EDEEEGD, LKTLLSL, RARSVAS, RRARSVA, ALITLAT, EELKKL, LALITLA                                                                                                                                                                                                                                                                                                                                                                                                                                                                                                                                                                                                                                                                                                                                                                                                                                                                                                                                                                                                                                                                                                                                                                                                                                                                                                                                                                                                                                                                                                                                                                                                                                                                                                                                                                                  |
| <i>Rattus norvegicus</i>     | 104 | FKNLREF, FVSDADS, IVYGDFFS, KVVKVTI, LLPLVSS, PGTAVLR, SSVLHST, TLIGEAV, VSGTNGT, VTLIGEA, AALALL, ALALLL, DAALALL, KKDKKKK, KLGSLVV, LLLDRL, PPTPKK, RSSRSR, SRSSRS, SSRSSR, TGAIKL, VLQPLQ, ALDISAS, AVVLLIL, EKMVSLL, GPLSAQT, LGSALLE, LGVGGK, LLPLTQY, QARSEDK, QEAYEQA, SLATVAY, VAGGIVA, YNYEPLT, ALITLAT, EIDRLNE, LALITLA, LFLAFVV, LIRAAEI, LKGCSC, LKKLEQ, LLLVAAG, LSKSLTE, SSDNIAL, SSTASAL, VNSVLLF, ADVEWKF, ETLKATE, EYFNVC, GPPGTGK, HISTIGV, IVDTVSA, NVAITRA, PPGTGKS, RYPANSI, SYATHSD, VAITRAK, VDLFRNA, YPANSIV, ATCEFCG, ETVKGLD, EVEKGV, FIKRSDA, FSASTA, GAKLAL, KGKAKKG, KLKALNL, LEILQKE, PACHNSE, SEARQHL, TLPTEVL, VEKGVLP, DEDEEEG, DIQLLKS, EEEQED, EVKPFIT, ILPSIIS, IPKEEVK, IQLLKA, KTTVASL, LKSAYEN, LKTLLSL, LSGHNLA, NGNLHPD, NLKTLLS, PEEEQEE, PEEHFIE, YVEEAK, LVKQGGD, QEKDEDD, RARTVAG, STDVVYR, VDAAKAY, YGCSCDQ, YQHEETI, FCLEASF, IALKGGK, IKVTLVF, KGGKIVN, RFFVVLG, RRSFYVY, RSFYVYA, TSNSFDV, VDNSSLT                                                                                                                                                                                                                                                                                                                                                                                                                                                                                                                                                                                                                                                                                                                                                                                                                                                                                                                                      |
| <i>Sus scrofa</i>            | 21  | DFTEERL, GPPGTGK, IQDSLSS, EKMVSLL, TTSYREA, IALKGGK, VDNSSLT, KGKAKKG, VETVKGL, AALALL, SASAFF, SRSSRS, FVSDADS, TLIGEAV, VTLIGEA, EDEEEGD, EVKPFIT, KEEVKPF, KHGGGVA, LKHGGGV, NLKTLLS, PEEEQEE                                                                                                                                                                                                                                                                                                                                                                                                                                                                                                                                                                                                                                                                                                                                                                                                                                                                                                                                                                                                                                                                                                                                                                                                                                                                                                                                                                                                                                                                                                                                                                                                                                                                                         |

**Supplementary Table S5** Hemagglutinin from influenza A virus (H1N1) (NCBI:taxid 641809)

| Organism                       | N° | Shared heptapeptides                                                                                                                                |
|--------------------------------|----|-----------------------------------------------------------------------------------------------------------------------------------------------------|
| <i>Bos taurus</i>              | 3  | GAINTSL, VASSLVL, YDYPKYS                                                                                                                           |
| <i>Gorilla gorilla gorilla</i> | 1  | AKLNREE                                                                                                                                             |
| <i>Homo sapiens</i>            | 16 | AELLVLL, AKLNREE, EELREQL, ELLVLE, ELREQLS, GAINSL, GVAPLHL, GVKLEST, KVRDQEG, LREQLSS, LRLATGL, MKAILV, VKLESTR, VRDQEG, YDYPKYS, YVKSTKL          |
| <i>Mus musculus</i>            | 17 | AADLKST, AELLVLL, AKLNREE, EELREQL, EKNVTVT, ELLVLE, GAINSL, GVKLEST, LIWLK, LREQLSS, PSTSADQ, QLSSVSS, TVLEKNV, TYNAELL, VASSLVL, YDYPKYS, YVKSTKL |
| <i>Oryctolagus cuniculus</i>   | 1  | AKLNREE                                                                                                                                             |
| <i>Pan troglodytes</i>         | 1  | DLKSTQN                                                                                                                                             |
| <i>Rattus norvegicus</i>       | 6  | AELLVLL, EELREQL, GAINSL, LREQLSS, VASSLVL, YDYPKYS                                                                                                 |
| <i>Sus scrofa</i>              | 2  | ASSLVL, YDYPKYS                                                                                                                                     |

**Supplementary Table S6** Major capsid protein L1 from human papillomavirus type 16 (NCBI:taxid 333760)

| Organism                 | N° | Shared heptapeptides                                                                                                                           |
|--------------------------|----|------------------------------------------------------------------------------------------------------------------------------------------------|
| <i>Bos taurus</i>        | 5  | ATPTTSS, KSEVPLD, LQPPPGG, TSSTSTT, TTSSTST                                                                                                    |
| <i>Homo sapiens</i>      | 16 | AAISTSE, AGTSRLL, AVGENVP, EKFSADL, GSGSTAN, KATPTTS, KGSGSTA, KSEVPLD, LQFIFQL, LQPPPGG, PGGTLED, PTPSGSM, PVPVSKV, QLFVTVV, TLQANKS, VPKVSGL |
| <i>Mus musculus</i>      | 12 | AGTSRLL, ATPTTSS, EKFSADL, GLQPPPG, GSGSTAN, KGSGSTA, KSEVPLD, LPPVPVS, LQPPPGG, PTTSSTS, QLFVTVV, QRAQGHN                                     |
| <i>Rattus norvegicus</i> | 9  | ATPTTSS, FTPSGS, GLQPPPG, GSGSTAN, KSEVPLD, LQPPPGG, SSTSTTA, STSTTAK, VAVNPGD                                                                 |

**Supplementary Table S7** Protective antigen from *Bacillus anthracis* (NCBI:taxid 1392)

| Organism                      | N° | Shared heptapeptides                                                                                                                                                              |
|-------------------------------|----|-----------------------------------------------------------------------------------------------------------------------------------------------------------------------------------|
| <i>Bos taurus</i>             | 3  | DNDGIPD, LPLYISN, PSENGDT                                                                                                                                                         |
| <i>Canis lupus familiaris</i> | 1  | RLLNESE                                                                                                                                                                           |
| <i>Homo sapiens</i>           | 20 | AKENQLS, DNDGIPD, ELENIPS, EVIQAEV, INKASNS, KLYWTDS, LELEKTK, LKEALKI, LPLYISN, LSIPSSE, NQLAELN, PLMALST, PLYISNP, QRENPT, RFHYDRN, RLLNESE, SSELENI, TSSTTGD, TSTNGIK, VLPTTSL |
| <i>Macaca mulatta</i>         | 1  | RLLNESE                                                                                                                                                                           |
| <i>Mus musculus</i>           | 19 | DNDGIPD, EVIQAEV, KLYWTDS, KRSTSAG, LEKTKQL, LKEALKI, LSIPSSE, PLMALST, PSDPLET, PTEKGLD, RLLNESE, SLAGERT, SNSNSST, SSELENI, SSTGNLE, TARIIFN, TLKEALK, TSTNGIK, VGADESV         |
| <i>Pan troglodytes</i>        | 1  | RLLNESE                                                                                                                                                                           |
| <i>Rattus norvegicus</i>      | 11 | EVIQAEV, KLYWTDS, KRSTSAG, LEKTKQL, LSIPSSE, MLNISSL, PLMALST, PSKNLAP, PTEKGLD, SKNTSTS, SSELENI                                                                                 |
| <i>Sus scrofa</i>             | 3  | ISKNTST, NSSTEGL, RLLNESE                                                                                                                                                         |
